# Supplementary material for: Sedimentation Rate and Contamination Levels Profile of Potentially Toxic Elements in the Limoncocha Lagoon RAMSAR Wetland in the Ecuadorian Amazon
Source: MDPI journal article supplement (doi:10.3390/environments10010002), 2022-12-21
Supplement: s1 [file s1]

Supplementary Information: Figure S1. Profile of individual contamination indices and their classification. Embedded table show the index values at different depths

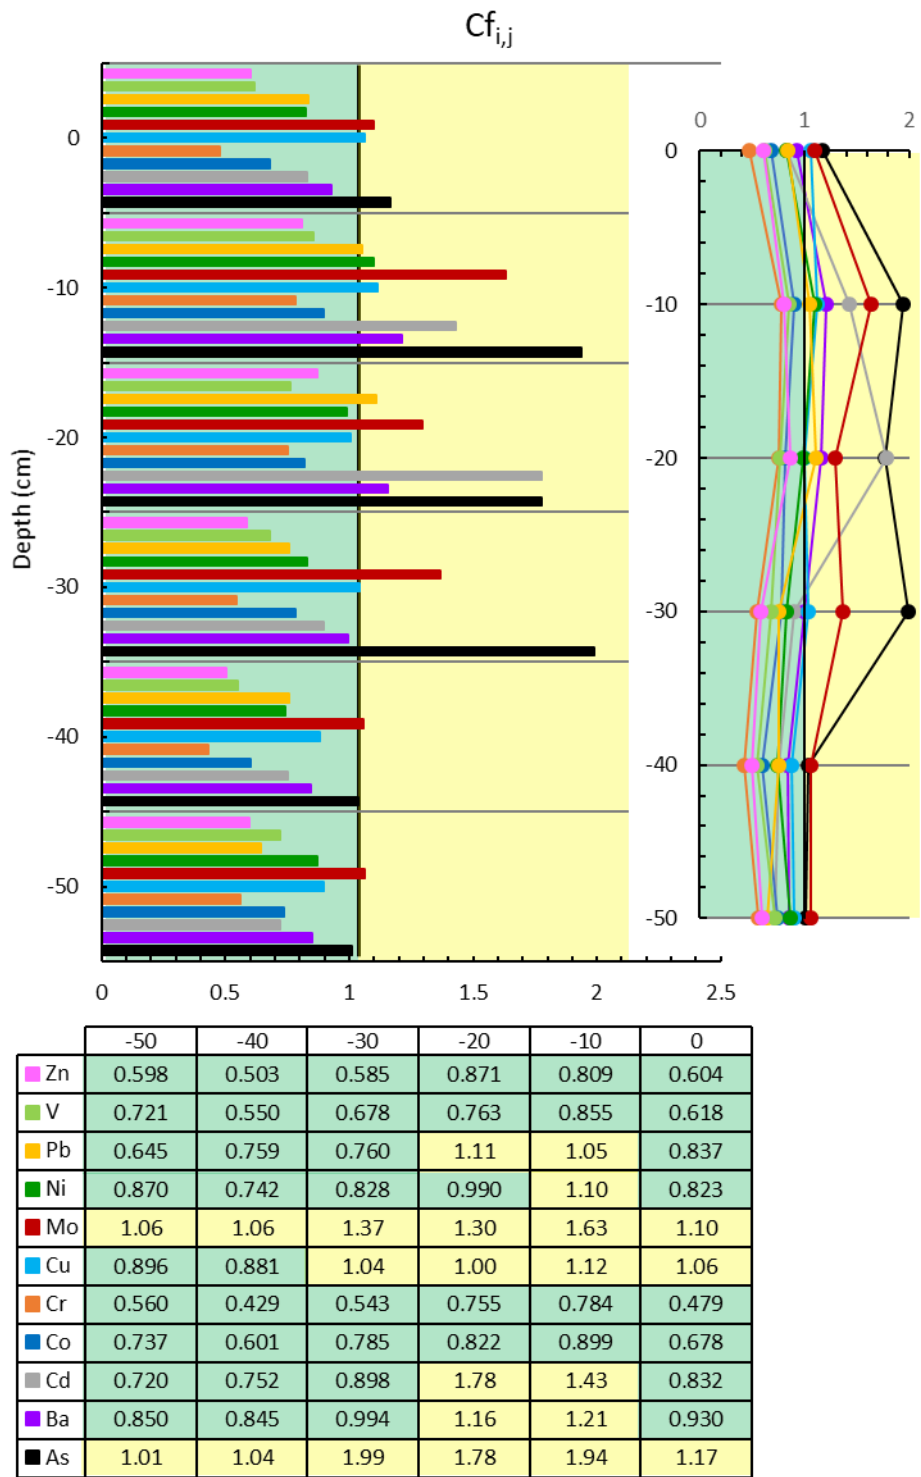

(a)

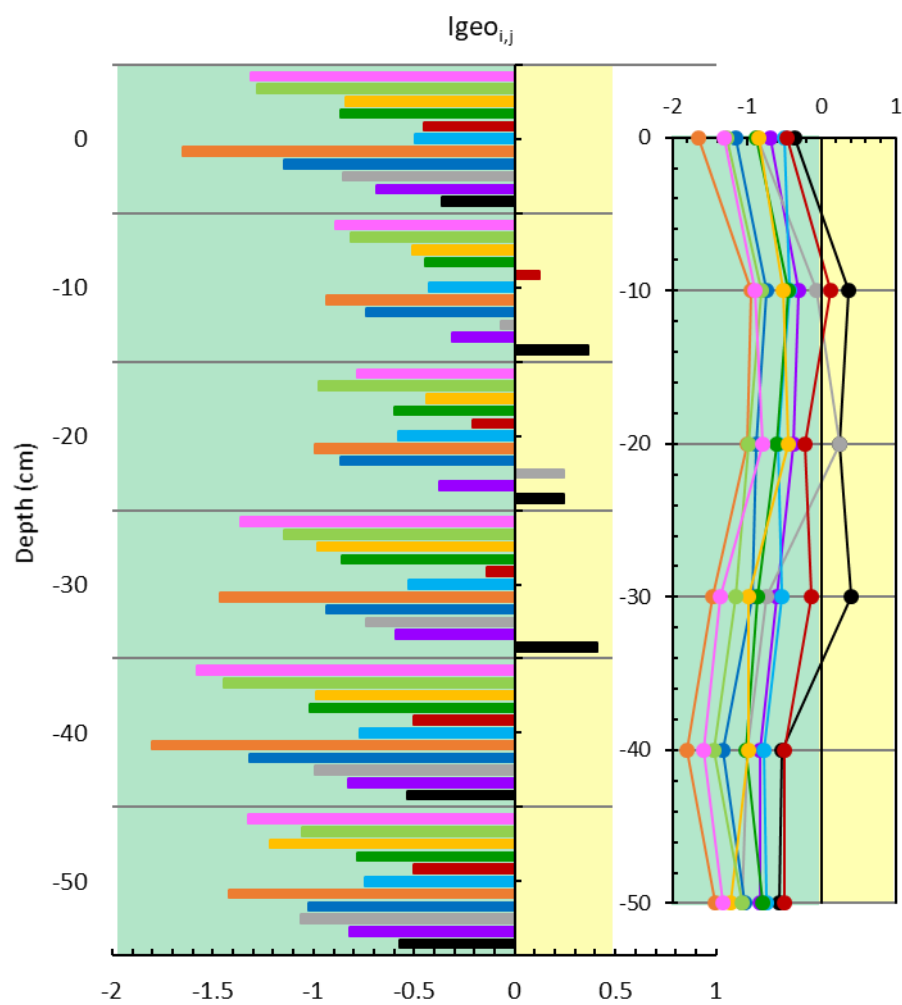

|    | -50    | -40    | -30    | -20    | -10    | 0      |
|----|--------|--------|--------|--------|--------|--------|
| Zn | -1.33  | -1.58  | -1.36  | -0.784 | -0.890 | -1.31  |
| V  | -1.06  | -1.45  | -1.15  | -0.975 | -0.812 | -1.28  |
| Pb | -1.22  | -0.983 | -0.981 | -0.435 | -0.509 | -0.842 |
| Ni | -0.785 | -1.02  | -0.857 | -0.600 | -0.448 | -0.867 |
| Mo | -0.501 | -0.501 | -0.135 | -0.212 | 0.121  | -0.452 |
| Cu | -0.744 | -0.768 | -0.528 | -0.578 | -0.427 | -0.498 |
| Cr | -1.42  | -1.80  | -1.47  | -0.99  | -0.94  | -1.65  |
| Co | -1.02  | -1.32  | -0.934 | -0.867 | -0.738 | -1.14  |
| Cd | -1.06  | -1.00  | -0.740 | 0.244  | -0.070 | -0.850 |
| Ba | -0.819 | -0.828 | -0.594 | -0.376 | -0.308 | -0.690 |
| As | -0.569 | -0.531 | 0.409  | 0.243  | 0.368  | -0.362 |

(b)

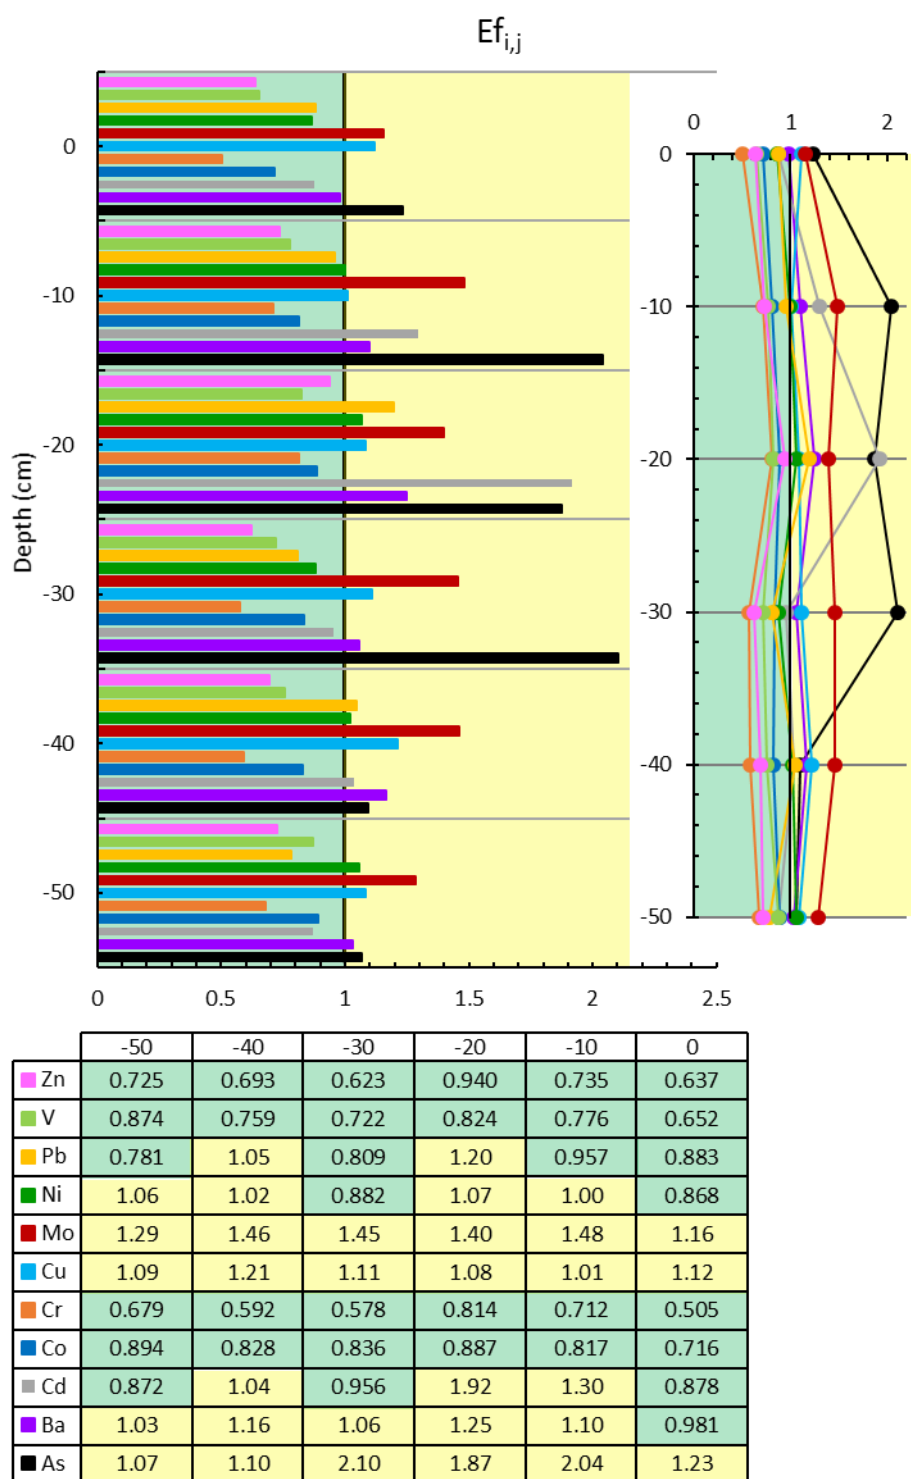

(c)

Figure S1. Profile of individual contamination indices and their classification. Cf:  $Cf < 1$  low pollution,  $1 < Cf < 3$  moderate contamination; Ef:  $Ef < 1$  no enrichment,  $1 < Ef < 3$  minor enrichment; Igeo:  $Igeo < 0$  uncontaminated,  $0 < Igeo < 1$  uncontaminated-moderately contaminated. Representation of pollutants: —●— As, —●— Ba, —●— Cd, —●— Co, —●— Cr, —●— Cu, —●— Mo, —●— Ni, —●— Pb, —●— V, —●— Zn.

Table of index values at different depths
