# Supplementary material for: Sedimentation Rate and Contamination Levels Profile of Potentially Toxic Elements in the Limoncocha Lagoon RAMSAR Wetland in the Ecuadorian Amazon
Source: MDPI journal article supplement (doi:10.3390/environments10010002), 2022-12-21
Supplement: s1 [file s1]

Archive with 1 entries (1 files):
- environments-2065164-supplementary.pdf
